# Supplementary material
Source: publisher site journal article supplement (https://www.dovepress.com/article/339898)

| **Supplementary materials**  Table S1. Sociodemographic and clinical characteristics of participants by psychiatric diagnosis and stress susceptibility (n=887) | | | | | | | | |
| --- | --- | --- | --- | --- | --- | --- | --- | --- |
|  | Psychiatric diagnosis | | | *p*-value for χ2 | Stress susceptibility | | | *p*-value for χ2 |
| Bipolar affective disorder (n=246) | Major depressive disorder (n=250) | Healthy participants (n=391) | Low (n=357) | Moderate (n=363) | High (n=167) |
| Sex |  |  |  |  |  |  |  |  |
| Male | 176 (71.5) | 167 (66.8) | 262 (67.0) | 0.42 | 246 (68.9) | 240 (66.1) | 119 (71.3) | 0.47 |
| Female | 70 (28.5) | 83 (33.2) | 129 (33.0) | 111 (31.1) | 123 (33.9) | 48 (28.7) |
| Age (years) |  |  |  |  |  |  |  |  |
| ≤ 30 | 60 (24.4) | 62 (24.8) | 95 (24.3) | 0.89 | 97 (27.2) | 64 (17.6) | 56 (33.5) | <0.001 |
| 31-44 | 77 (31.3) | 76 (30.4) | 133 (34.0) | 131 (36.7) | 111 (30.6) | 44 (26.3) |
| ≥ 45 | 109 (44.3) | 112 (44.8) | 163 (41.7) | 12+ (36.1) | 188 (51.8) | 67 (40.1) |
| Marital status |  |  |  |  |  |  |  |  |
| Single | 118 (48.0) | 127 (50.8) | 186 (47.6) | 0.06 | 183 (51.3) | 167 (46.0) | 81 (48.5) | <0.001 |
| Married | 92 (37.4) | 89 (35.6) | 171 (43.7) | 158 (44.3) | 127 (35.0) | 67 (40.1) |
| Other | 36 (14.6) | 34 (13.6) | 34 (8.7) | 16 (4.5) | 69 (19.0) | 19 (11.4) |
| Education |  |  |  |  |  |  |  |  |
| University and higher | 124 (50.4) | 121 (48.4) | 256 (65.5) | <0.001 | 268 (75.1) | 147 (40.5) | 86 (51.5) | <0.001 |
| Senior high school | 95 (38.6) | 103 (41.2) | 109 (27.9) | 82 (23.0) | 162 (44.6) | 63 (37.7) |
| Junior high school and lower | 27 (11.0) | 26 (10.4) | 26 (6.6) | 7 (2.0) | 54 (14.9) | 18 (10.8) |
| Body mass index (kg/m2) |  |  |  |  |  |  |  |  |
| Underweight (< 18.5) | 13 (5.3) | 16 (6.4) | 22 (5.6) | 0.90 | 11 (3.1) | 25 (6.9) | 15 (9.0) | <0.001 |
| Healthy weight (18.5- < 24.0) | 150 (61.0) | 139 (55.6) | 220 (56.3) | 256 (71.7) | 174 (47.9) | 79 (47.3) |
| Overweight (24.0- < 27.0) | 43 (17.5) | 46 (18.4) | 73 (18.7) | 49 (13.7) | 71 (19.6) | 42 (25.1) |
| Obesity (≥ 27.0) | 40 (16.3) | 49 (19.6) | 76 (19.4) | 41 (11.5) | 93 (25.6) | 31 (18.6) |
| Lifestyle |  |  |  |  |  |  |  |  |
| Regular exercise (> 2 times/ week) | 89 (36.2) | 110 (44.0) | 239 (61.1) | <0.001 | 172 (48.2) | 175 (48.2) | 91 (54.5) | 0.34 |
| Cigarette use |  |  |  |  |  |  |  |  |
| Non-smoker | 188 (76.4) | 177 (70.8) | 312 (79.8) | 0.07 | 317 (88.8) | 237 (65.3) | 123 (73.7) | <0.001 |
| Ex-smoker | 24 (9.8) | 28 (11.2) | 39 (10.0) | 25 (7.0) | 44 (12.1) | 22 (13.2) |
| Current smoker | 34 (13.8) | 45 (18.0) | 40 (10.2) | 15 (4.2) | 82 (22.6) | 22 (13.2) |
| Regular alcohol drinking (> 1year) | 30 (12.2) | 33 (13.2) | 38 (9.7) | 0.36 | 17 (4.8) | 67 (18.5) | 17 (10.2) | <0.001 |
| Comorbid adulthood disease |  |  |  |  |  |  |  |  |
| Cardiovascular disease | 28 (11.4) | 40 (16.0) | 66 (16.9) | 0.15 | 38 (10.6) | 70 (19.3) | 26 (15.6) | 0.01 |
| Endocrinology disease | 82 (33.3) | 98 (39.2) | 162 (41.4) | 0.12 | 92 (25.8) | 172 (47.4) | 78 (46.7) | <0.001 |
| Gastroenterology disease | 48 (19.5) | 61 (24.4) | 99 (25.3) | 0.22 | 56 (15.7) | 105 (28.9) | 47 (28.1) | <0.001 |
| Urinary system disease | 10 (4.1) | 10 (4.0) | 11 (2.8) | 0.62 | 7 (2.0) | 15 (4.1) | 9 (5.4) | 0.10 |
| Infectious disease | 38 (15.4) | 44 (17.6) | 70 (17.9) | 0.71 | 48 (13.4) | 79 (21.8) | 25 (15.0) | 0.01 |
| Neuromuscular disease | 53 (21.5) | 68 (27.2) | 86 (22.0) | 0.23 | 44 (12.3) | 114 (31.4) | 49 (29.3) | <0.001 |
| Autoimmune disease/asthma and allergy | 64 (26.0) | 59 (23.6) | 117 (29.9) | 0.19 | 92 (25.8) | 93 (25.6) | 55 (32.9) | 0.17 |

| Table S2. Between-group comparisons of indicator variables among empirically-derived subgroups of stress susceptibility | | | | | |
| --- | --- | --- | --- | --- | --- |
|  | Stress susceptibility* | | | Omnibus *p*-value  for ANOVA | *Post-hoc* comparison |
| (a) Low (n=357, 40.3%) | (b) Moderate (n=363, 40.9%) | (c) High (n=167, 18.8%) |
| Mean (SD) | Mean (SD) | Mean (SD) |
| Indicator variables for latent class analysis |  |  |  |  |  |
| Eysenck Personality Questionnaire |  |  |  |  |  |
| Neuroticism | 3.44 (1.33)b,c | 7.51 (1.65)a,c | 8.64 (1.59)a,b | <0.001 | c>b>a |
| Extraversion | 6.34 (2.88)b,c | 5.31 (2.77)a,c | 4.62 (2.76)a,b | <0.001 | a>b>c |
| Tridimensional Personality Questionnaire |  |  |  |  |  |
| Harm Avoidance | 5.33 (3.16)b,c | 11.18 (3.39)b,c | 13.51 (3.30)a,b | <0.001 | c>b>a |
| Novelty Seeking | 7.33 (2.78)c | 7.52 (3.28) | 8.03 (3.02)a | 0.04 | c>a |
| Perceived Stress Scale | 15.43 (4.34)b,c | 21.17 (3.75)a,c | 25.40 (5.35)a,b | <0.001 | c>b>a |
| Beck Anxiety Inventory | 2.77 (3.96)b,c | 7.87 (5.71)a,c | 28.49 (9.11)a,b | <0.001 | c>b>a |
| *Subgroups of stress susceptibility were labeled as a: low, b: moderate, and c: high, respectively. Superscript numbers denoted significant between-group differences in post-hoc comparisons. | | | | | |

| Table S3. Univariate analysis for factors associated with Pittsburgh Sleep Quality Index and Composite Scale of Morningness (n=887) | | | | | |
| --- | --- | --- | --- | --- | --- |
|  | Pittsburgh Sleep  Quality Index | | *p*-value for t test/ ANOVA | Composite Scale of Morningness | *p*-value for t test/ ANOVA |
| Mean (SD) | | Mean (SD) |
| Sex |  | |  |  |  |
| Male | 7.65 (3.44) | | 0.64 | 47.39 (12.07) | 0.58 |
| Female | 7.70 (3.44) | | 47.53 (12.01) |
| Age (years) |  | |  |  |  |
| ≤ 30 | 7.94 (3.67) | | 0.17 | 46.90 (11.69) | 0.71 |
| 31-44 | 7.37 (3.19) | | 47.80 (11.58) |
| ≥ 45 | 7.72 (3.47) | | 47.46 (12.59) |
| Marital status |  | |  |  |  |
| Single | 7.79 (3.47) | | 0.57 | 47.22 (11.94) | 0.62 |
| Married | 7.54 (3.48) | | 47.89 (11.94) |
| Other | 7.58 (3.13) | | 46.77 (12.86) |
| Education |  | |  |  |  |
| University and higher | 7.46 (3.37) | | 0.12 | 48.04 (12.12) | 0.22 |
| Senior high school | 7.91 (3.51) | | 46.52 (12.01) |
| Junior high school and lower | 8.02 (3.54) | | 47.16 (11.63) |
| Body mass index (kg/m2) |  | |  |  |  |
| Underweight (< 18.5) | 8.34 (3.66) | | 0.13 | 47.90 (11.61) | 0.96 |
| Healthy weight (18.5- < 24.0) | 7.45 (3.23) | | 47.52 (11.64) |
| Overweight (24.0- < 27.0) | 7.75 (3.41) | | 47.44 (12.29) |
| Obesity (≥ 27.0) | 8.02 (3.96) | | 47.02 (13.20) |
| Lifestyle |  | |  |  |  |
| Regular exercise (> 2 times/ week) | 7.63 (3.48) | | 0.65 | 46.92 (12.38) | 0.10 |
| Cigarette use |  | |  |  |  |
| Non-smoker | 7.58 (3.40) | | 0.40 | 47.86 (11.71) | 0.10 |
| Ex-smoker | 7.83 (3.54) | | 47.00 (12.57) |
| Current smoker | 8.01 (3.57) | | 45.32 (13.31) |
| Regular alcohol drinking (> 1year) | 7.23 (3.37) | | 0.85 | 46.68 (12.15) | 0.62 |
| Comorbid adulthood disease |  | |  |  |  |
| Cardiovascular disease |  | |  |  |  |
| No | 7.56 (3.36) | | 0.26 | 47.51 (11.91) | 0.30 |
| Yes | 8.27 (3.81) | | 47.02 (12.83) |
| Endocrinology disease |  | |  |  |  |
| No | 7.49 (3.41) | | 0.95 | 47.99 (11.84) | 0.42 |
| Yes | 7.95 (3.46) | | 46.55 (12.32) |
| Gastroenterology disease |  | |  |  |  |
| No | 7.57 (3.36) | | 0.09 | 47.75 (12.01) | 0.99 |
| Yes | 7.96 (3.68) | | 46.40 (12.14) |
| Urinary system disease |  | |  |  |  |
| No | 7.62 (3.41) | | 0.20 | 47.51 (12.05) | 0.58 |
| Yes | 8.87 (3.97) | | 45.28 (11.88) |
| Infectious disease |  | |  |  |  |
| No | 7.58 (3.41) | | 0.74 | 47.57 (11.99) | 0.93 |
| Yes | 8.08 (5.54) | | 46.75 (12.31) |
| Neuromuscular disease |  | |  |  |  |
| No | 7.50 (3.39) | | 0.28 | 47.89 (11.99) | 0.67 |
| Yes | 8.19 (3.55) | | 45.93 (12.13) |
| Autoimmune disease/asthma and allergy | |  |  |  |  |
| No | 7.69 (3.42) | | 0.90 | 47.21 (12.11) | 0.82 |
| Yes | 7.59 (3.49) | | 48.04 (11.88) |
| Psychiatric diagnosis |  | |  |  |  |
| Bipolar affective disorder | 8.26 (3.45) | | <0.001 | 46.27 (12.90) | <0.001 |
| Major depressive disorder | 9.34 (3.86) | | 44.47 (13.20) |
| Healthy participants | 6.21 (2.39) | | 50.06 (10.02) |
| Stress susceptibility |  | |  |  |  |
| Low | 6.21 (2.73) | | <0.001 | 51.16 (10.49) | <0.001 |
| Moderate | 8.04 (3.24) | | 47.15 (11.62) |
| High | 9.94 (3.77) | | 40.07 (12.62) |

| Table S4. Comparisons between the full model and the reduced model in linear regression analyses for factors associated with Pittsburgh Sleep Quality Index (n=887) | | | | |
| --- | --- | --- | --- | --- |
|  | Full model | | Reduced model | |
| B (se) | *p*-value | B (se) | *p*-value |
| Sex |  |  |  |  |
| Male vs. Female | 0.06 (0.21) | 0.79 | 0.06 (0.21) | 0.79 |
| Age (years) |  |  |  |  |
| ≤30 vs. ≥ 45 | 0.29 (0.25) | 0.24 | 0.30 (0.25) | 0.23 |
| 31-44 vs. ≥ 45 | -0.01 (0.23) | 0.95 | -0.01 (0.23) | 0.98 |
| Composite Scale of Morningness | -0.02 (0.01) | 0.01 | - | - |
| Beck Depression Inventory-II | 0.12 (0.01) | <0.001 | 0.12 (0.01) | <0.001 |
| Psychiatric diagnosis |  |  |  |  |
| Bipolar affective disorder vs. Healthy | 1.00 (0.25) | <0.001 | 1.02 (0.25) | <0.001 |
| Major depressive disorder vs. Healthy | 1.56 (0.27) | <0.001 | 1.59 (0.27) | <0.001 |
| Stress Susceptibility |  |  |  |  |
| High vs. Low | 0.53 (0.36) | 0.14 | 0.73 (0.35) | 0.04 |
| Medium vs. Low | 0.53 (0.24) | 0.03 | 0.59 (0.24) | 0.01 |

Figure S1: The radar chart for profiling indicator variables of empirical subgroups clustered by latent class analysis. Score for all indicator variables were transformed to t-scores.


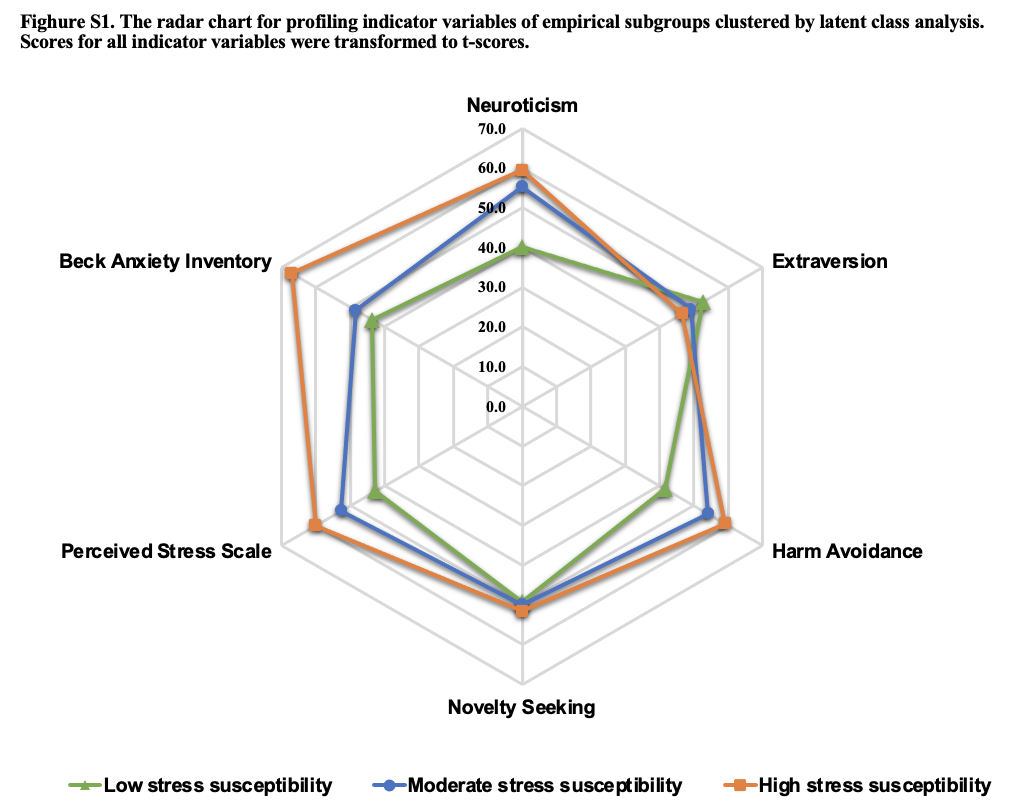

Supplement: Supplementary file 1 [file get_supplementary_file.php]
